# Supplementary material for: Latilactobacillus curvatus FFZZH5L isolated from pickled cowpea enhanced antioxidant activity in Caenorhabditis elegans by upregulating the level of glutathione S-transferase
Source: Royal Society of Chemistry journal article supplement (doi:10.1039/d3fo03093h), 2023-01-01
Supplement: d3fo03093h1.pdf [file d3fo03093h1.pdf]

***Latilactobacillus curvatus* FFZZH5L isolated from pickled cowpea enhanced antioxidant activity in *Caenorhabditis elegans* by upregulating the level of glutathione S-transferase**

**Hengqian Lu<sup>1,2</sup>, Liangyin Sun<sup>1,2</sup>, Sijia Tong<sup>1,2</sup>, Fei Jiang<sup>1,2</sup>, Liping Chen<sup>1,2</sup>, Yongzhong Wang<sup>1,2,3\*</sup>**

<sup>1</sup>School of Life Sciences, Anhui University, Hefei 230601, Anhui, China

<sup>2</sup>Key Laboratory of Human Microenvironment and Precision Medicine of Anhui Higher Education Institutes, Anhui University, Hefei 230601, Anhui, China

<sup>3</sup>Anhui Key Laboratory of Modern Biomanufacturing, Hefei 230601, Anhui, China.

\* Corresponding author: Yongzhong Wang. E-mail: [yzwang@ahu.edu.cn](mailto:yzwang@ahu.edu.cn)

**Table S1. Primer sequences used in this study.**

| Primer name    | Sequence (5'-3')          |
|----------------|---------------------------|
| <i>27F</i>     | AGAGTTTGATCCTGGCTCAG      |
| <i>1492R</i>   | TACGGCTACCTTGTTACGACTT    |
| <i>tba-1F</i>  | CACCACCGCCATCGCTGAAG      |
| <i>tba-1R</i>  | CTCTCCCTCCTCCATTCCTTCTCC  |
| <i>skn-1F</i>  | GGTCTCCGTTGGCGTGATGATC    |
| <i>skn-1R</i>  | CTGGTGGATGCTCGGTGAGTATTG  |
| <i>daf-16F</i> | CGCCGCTACCATCTGACATCAC    |
| <i>daf-16R</i> | TCCGCCAAAAGAAGCCGAACG     |
| <i>sod-1F</i>  | TGGAAGCTGGAGCCGATGGAG     |
| <i>sod-1R</i>  | TCGCCGAGGTCGTCTTGTC       |
| <i>sod-3F</i>  | TCACTATTGCGGTTCAAGGCTCTG  |
| <i>sod-3R</i>  | TTGCACAGGTGGCGATCTTCAAG   |
| <i>sod-5F</i>  | TGCCAATGCCGTTCTTCCACAG    |
| <i>sod-5R</i>  | AACAGTTCCGAAGACAGCAGTTCC  |
| <i>gst-1F</i>  | CCGTCATCTCGCTCGTCTTAATGG  |
| <i>gst-1R</i>  | AGCCTTGCCGTTCTCGTAGTTTC   |
| <i>gst-4F</i>  | AGTTGTTGAACCAGCCCGTGATG   |
| <i>gst-4R</i>  | GCCCAAGTCAATGAGTCTCCAACG  |
| <i>gst-10F</i> | CCGTCTTCTGTTCCCTCGACAATGG |
| <i>gst-10R</i> | CAATCTCTTGCCCGTCCACCTTC   |
| <i>akt-1F</i>  | TGAGGGATGGCTTCACAAGAAAGG  |
| <i>akt-1R</i>  | TCAATGGCTCAGGAAACGGTTGTC  |

**Table S2. Antibiotic susceptibility test results**

| Antibiotics   | Results (- is resistant, + is moderately sensitive, ++ is sensitive) |
|---------------|----------------------------------------------------------------------|
| Vancomycin    | -                                                                    |
| Streptomycin  | -                                                                    |
| Penicillin    | ++                                                                   |
| Cefotaxime    | +                                                                    |
| Ampicillin    | -                                                                    |
| Kanamycin     | -                                                                    |
| Ciprofloxacin | -                                                                    |
| Norfloxacin   | -                                                                    |
| Clindamycin   | ++                                                                   |
| Erythromycin  | +                                                                    |
| Tetracycline  | ++                                                                   |

**Table S3. Results of the sole carbon source utilization**

| Sole source of carbon | Results (+ is positive, - is negative) |
|-----------------------|----------------------------------------|
| D-Sorbitol            | +                                      |
| Glycerol              | -                                      |
| Mannitol              | +                                      |
| D-Galactose           | +                                      |
| Maltose               | +                                      |
| Fructose              | +                                      |
| Sucrose               | +                                      |
| Glucose               | +                                      |

**Table S4 Minimum inhibitory concentration test of *L. curvatus* FFZZH5L for *S. aureus***

| Percentage of <i>L. curvatus</i> FFZZH5L | <i>S. aureus</i>   |
|------------------------------------------|--------------------|
| control                                  | $2.25 \times 10^7$ |
| 100%                                     | $1.68 \times 10^5$ |
| 50%                                      | $9.5 \times 10^5$  |
| 25%                                      | $3.52 \times 10^6$ |
| 12.5%                                    | $2.4 \times 10^7$  |

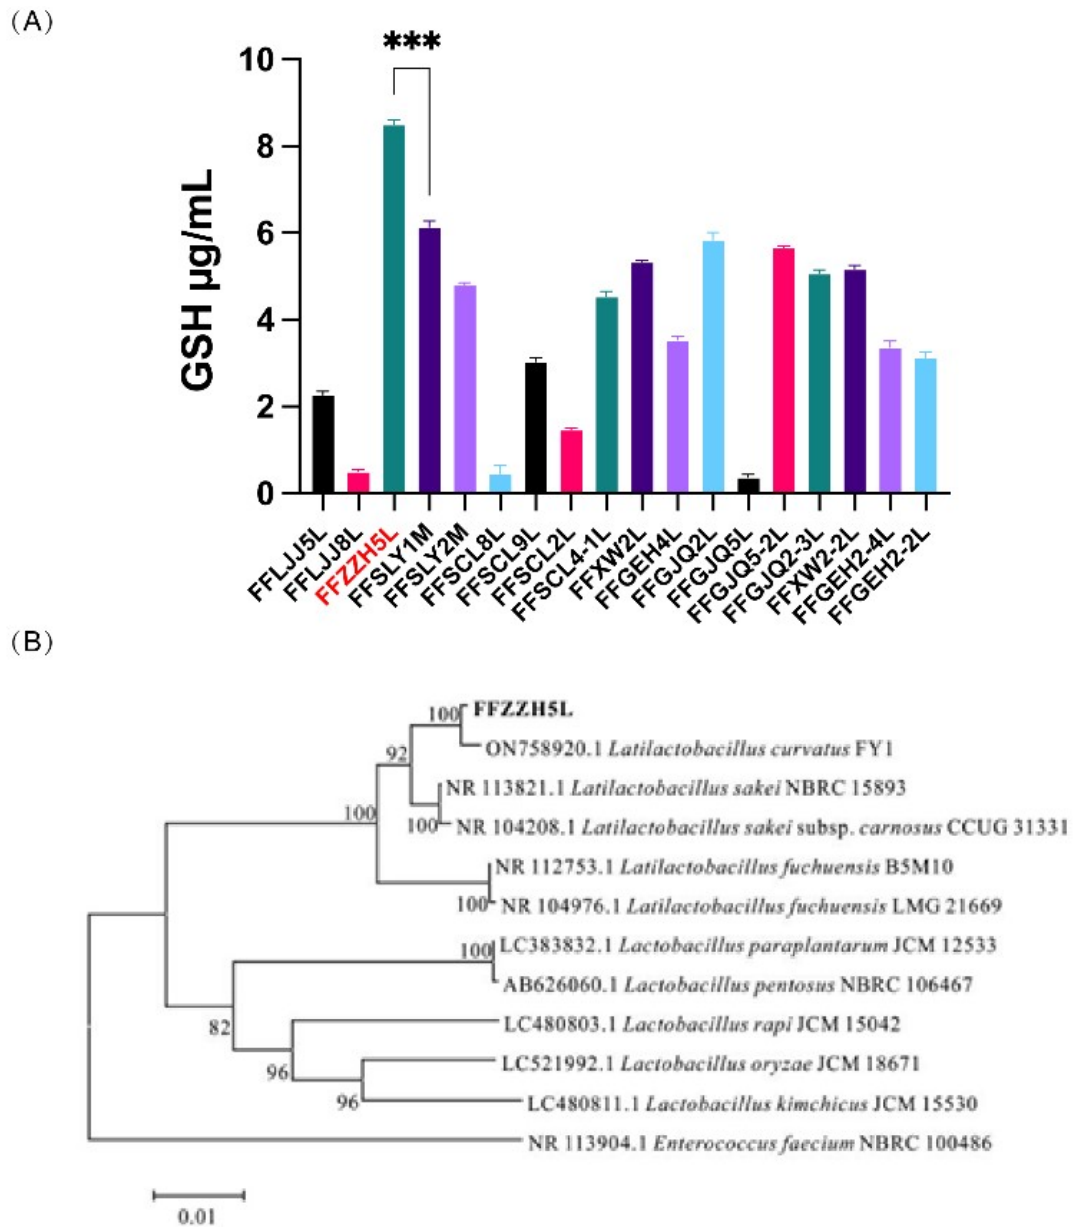

**Figure S1. Screen and identification of strains with strong antioxidant activity.** (A) strain with high GSH activity (FFZZH5L) was screened from numbers of strain isolated from fermented foods; (B) Phylogenetic tree, strain FFZZH5L was identified as a strain of *Latilactobacillus curvatus* by 16S rRNA sequencing and blast comparison on NCBI.
